# Supplementary material for: Detection of the Three Gorges Dam influence on the Changjiang (Yangtze River) submerged delta
Source: PubMed Central journal article supplement — Sci Rep. 2014 Oct 16;4:6600. doi: 10.1038/srep06600 (PMC5377575; doi:10.1038/srep06600), 2014-10-16
Supplement: srep06600-s1.pdf [file srep06600-s1.pdf]

## **Supplementary Information for:**

### **Detection of the Three Gorges Dam influence on the Changjiang (Yangtze River) submerged delta**

Zhijun Dai<sup>1\*°</sup>, James T. Liu<sup>2\*°</sup>, Wen Wei<sup>1</sup>, Jiyu Chen<sup>1</sup>

<sup>1</sup>State Key Lab of Estuarine & Coastal Research, East China Normal University,  
Shanghai 20006, China

<sup>2</sup>Department of Oceanography, National Sun Yat-sen Kaohsiung, Taiwan 80424

\*Correspondence to: [zjdai@sklec.ecnu.edu.cn](mailto:zjdai@sklec.ecnu.edu.cn); [james@mail.nsysu.edu.tw](mailto:james@mail.nsysu.edu.tw)

<sup>°</sup>These authors contributed equally to this work.

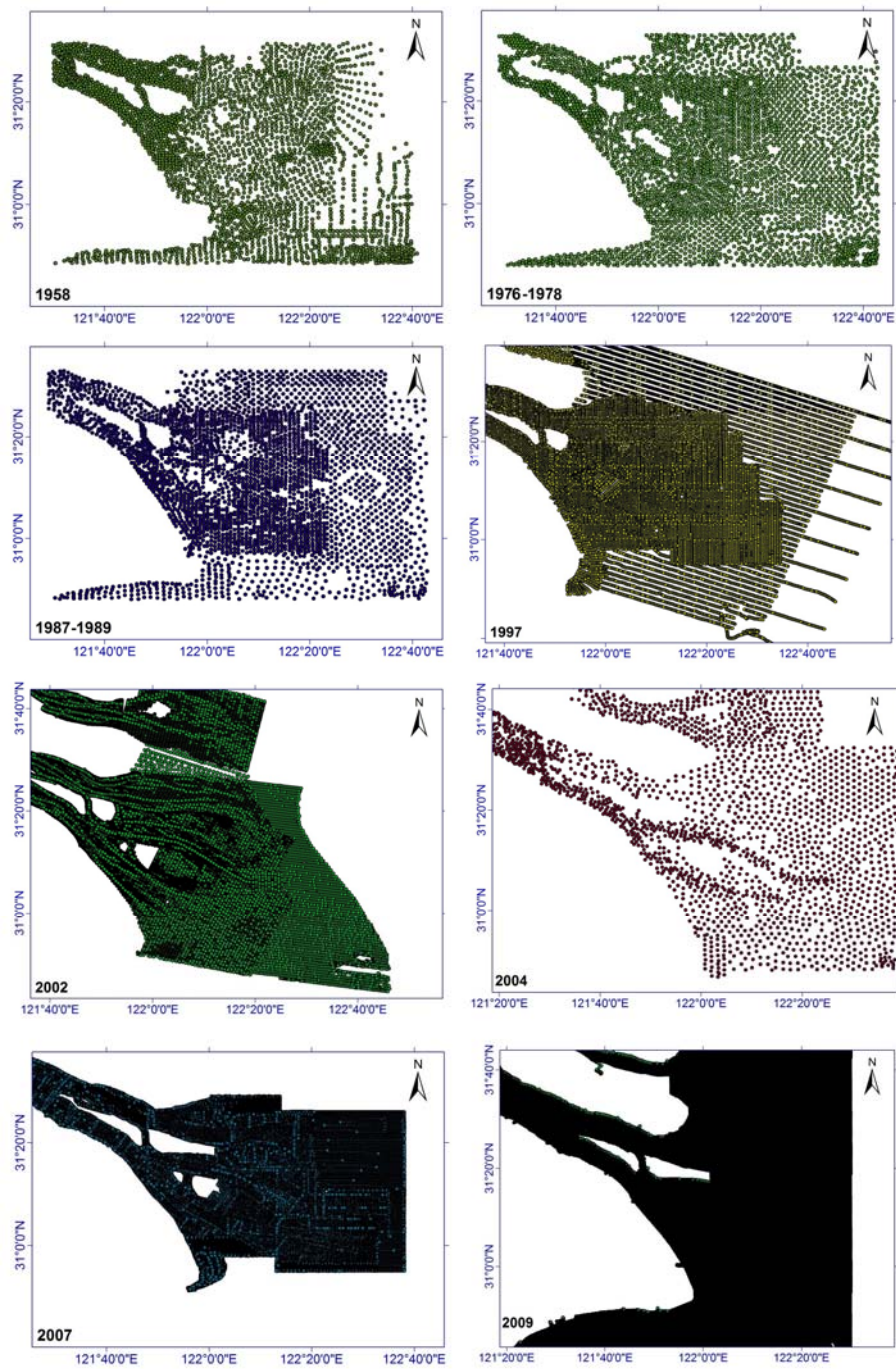

Fig. S1. Data points extracted from the Changjiang Estuary navigational charts drawn by ArcGis 9.3

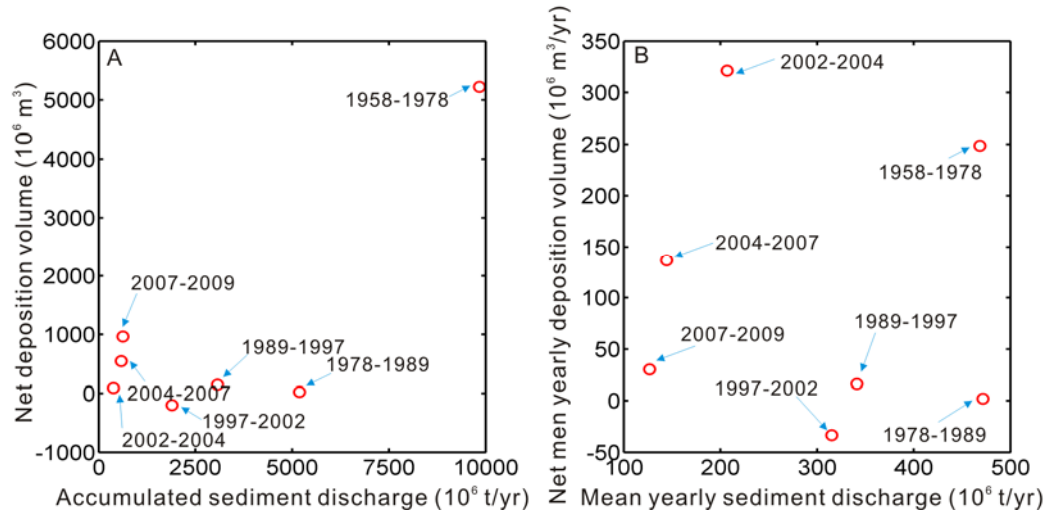

Fig. S2. Scattered points of sediment discharge into the estuary vs. deposition volume of the CSD. (A. the accumulated sediment discharge vs. correspondingly net deposition volume of the CSD during the different phases; B. the mean accumulated sediment discharge vs. correspondingly net mean deposition volume of the CSD during the different phases).

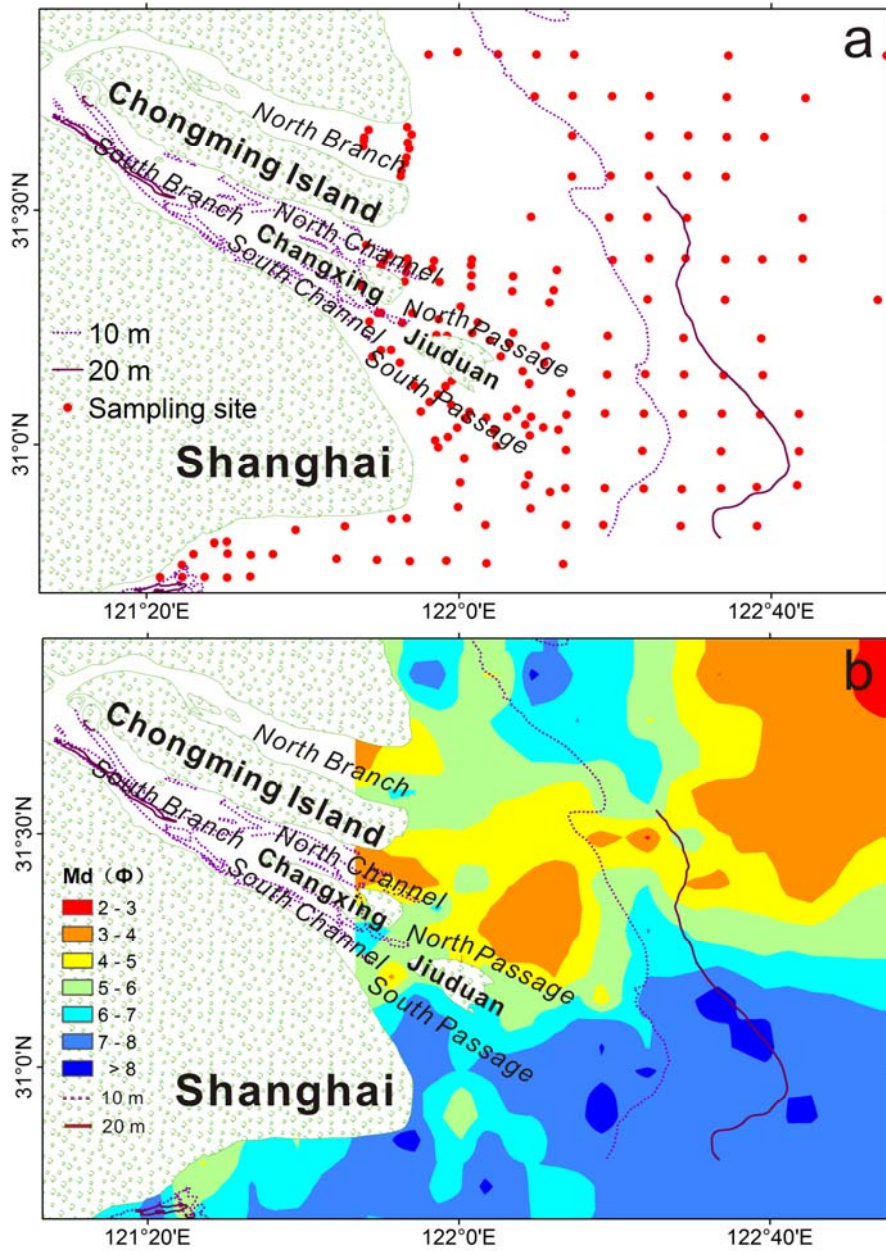

Fig. S3 The collected samples distribution (a) and corresponding distribution of the mean grain size ( $\phi$ )

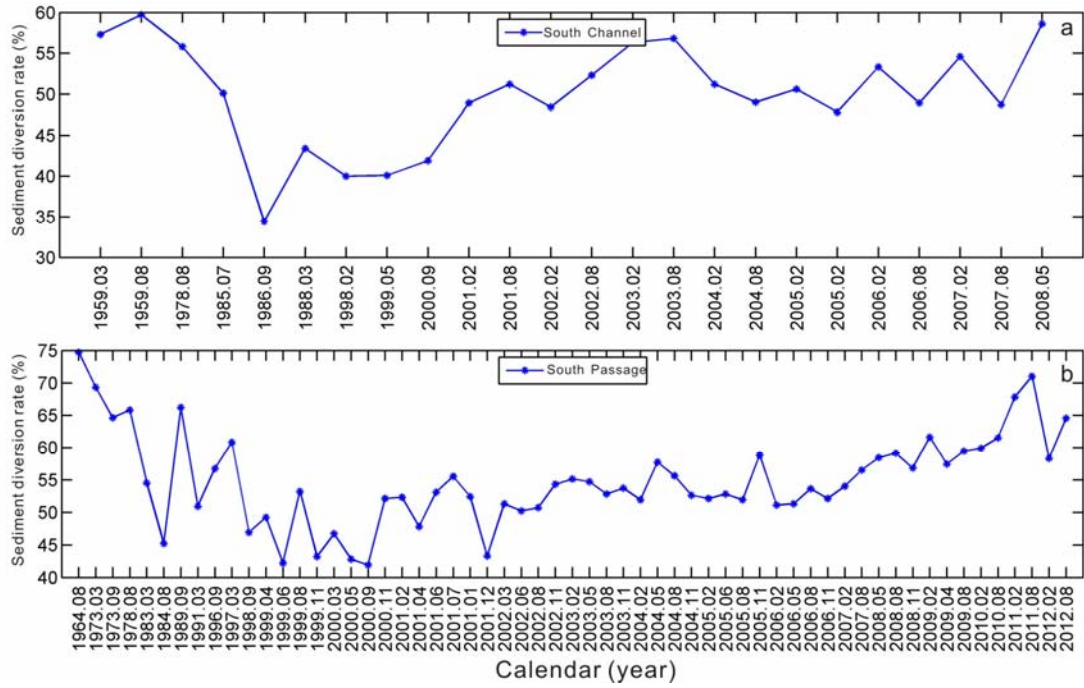

Fig. S4. River load partition between the S. Channel and Passage.

Table S1. Changjiang Estuary navigational charts

| Date | Map Title                                                                                                                          | Scale     | Surveyed  | Published |
|------|------------------------------------------------------------------------------------------------------------------------------------|-----------|-----------|-----------|
| 1958 | Changjiang Estuary and adjacent area (Survey done by the Navigation Guarantee Department of the Chinese Navy Headquartes) (NGDCNH) | 1:100,000 | 1958      | Nov. 1959 |
| 1978 | Changjiang Estuary and adjacent area (NGDCNH)                                                                                      | 1:120,000 | 1976~1978 | Nov. 1979 |
| 1989 | Changjiang Estuary and adjacent area (NGDCNH)                                                                                      | 1:120,000 | 1987~1989 | June 1990 |
| 1997 | Changjiang Estuary and adjacent area (Survey done by Hydrological Bureau of the Changjiang Estuary) (HBCE)                         | 1:50000   | 1997      |           |
| 2002 | Changjiang Estuary and adjacent area (HBCE)                                                                                        | 1:100,000 | 2002      |           |
| 2004 | Changjiang Estuary and adjacent area (NGDCNH)                                                                                      | 1:120,000 | 2004      | Dec. 2004 |
| 2007 | Changjiang Estuary and adjacent area (HBCE)                                                                                        | 1:50000   | 2007      |           |
| 2009 | Changjiang Estuary and adjacent area (Surveyed done by Shanghai Institute of Geological Survey, China)                             | 1:50000   | 2009      |           |

Table S2. Accretion and erosion of the North Channel region above -10 m isobaths over different time intervals ( $10^6 \text{ m}^3$ )

|      | 1958-1978 | 1978-1989 | 1989-1997 | 1997-2002 | 2002-2004 | 2004-2007 | 2007-2009 |
|------|-----------|-----------|-----------|-----------|-----------|-----------|-----------|
| Ev.  | -528      | -454      | -576      | -480      | -504      | -688      | -273      |
| Av.  | +1270     | +731      | +581      | +442      | +873      | +746      | +448      |
| Nv.  | +742      | +277      | +5        | -38       | +369      | +58       | +175      |
| Mnv. | +37       | +25       | +0.62     | -7.6      | +184      | +19       | +87.5     |

Ev: The eroded volume of the observed period; Av: The accreted volume of the observed period; Nv. The net volume changes of the observed period; Mnv. The mean yearly net volume changes of the observed periods.

Table S3. Accretion and erosion of the North Passage region above the -10 m isobath over different time intervals ( $\times 10^6 \text{ m}^3$ )

|      | 1958-1978 | 1978-1989 | 1989-1997 | 1997-2002 | 2002-2004 | 2004-2007 | 2007-2009 |
|------|-----------|-----------|-----------|-----------|-----------|-----------|-----------|
| Ev.  | -332      | -494      | -156      | -385      | -426      | -426      | -188      |
| Av.  | +1476     | +623      | +601      | +303      | +440      | +755      | +87       |
| Nv.  | +1144     | +129      | +445      | -82       | +14       | +329      | -101      |
| Mnv. | +57       | +12       | +56       | -16       | +7        | +109      | -50       |

Ev: The eroded volume of the observed period; Av: The accreted volume of the observed period; Nv. The net volume changes of the observed period; Mnv. The mean yearly net volume changes of the observed periods.



Table S4. Accretion and erosion of the South Passage region above the -10 m isobaths over different time intervals ( $\times 10^6 \text{ m}^3$ )

|      | 1958-1978 | 1978-1989 | 1989-1997 | 1997-2002 | 2002-2004 | 2004-2007 | 2007-2009 |
|------|-----------|-----------|-----------|-----------|-----------|-----------|-----------|
| Ev.  | -59       | -146      | -125      | -154      | -97       | -168      | -88       |
| Av.  | +545      | +133      | +134      | +245      | +346      | +170      | +70       |
| Nv.  | +486      | -13       | +9        | +91       | +249      | +2        | -18       |
| Mnv. | +24       | -1        | +1        | +18       | +125      | +0.67     | -9        |

Ev: The eroded volume of the observed period; Av: The accreted volume of the observed period; Nv. The net volume changes of the observed period; Mnv. The mean yearly net volume changes of the observed periods.

Table S5. Accretion and erosion of the Changjiang estuarine submerged delta below the -10 m isobaths over different time intervals ( $\times 10^6 \text{ m}^3$ )

|      | 1958-1978 | 1978-1989 | 1989-1997 | 1997-2002 | 2002-2004 | 2004-2007 | 2007-2009 |
|------|-----------|-----------|-----------|-----------|-----------|-----------|-----------|
| Ev.  | -274      | -754      | -604      | -345      | -66       | -114      | -33       |
| Av.  | +3125     | +384      | +291      | +174      | +398      | +270      | +67.7     |
| Nv.  | +2851     | -370      | -313      | -171      | +332      | +156      | +35       |
| Mnv. | +143      | -34       | -39       | -34       | +166      | +52       | +17       |

Ev: The eroded volume of the observed period; Av: The accreted volume of the observed period; Nv. The net volume changes of the observed period; Mnv. The mean yearly net volume changes of the observed periods.

Table S6. Accretion and erosion of the whole submerged delta over different time intervals ( $\times 10^6$  m<sup>3</sup>)

|      | 1958-1978 | 1978-1989 | 1989-1997 | 1997-2002 | 2002-2004 | 2004-2007 | 2007-2009 |
|------|-----------|-----------|-----------|-----------|-----------|-----------|-----------|
| Area | 4930      | 5158      | 5214      | 5129      | 5473      | 4134      | 3379      |
| Ar1  | 1252      | 2499      | 2627      | 2559      | 1428      | 2029      | 2037      |
| Ev.  | -1193     | -1848     | -1461     | -1364     | -1093     | -1395     | -582      |
| EL.  | -0.95     | -0.74     | -0.56     | -0.53     | -0.77     | -0.69     | -0.29     |
| Ar2  | 3678      | 2659      | 2587      | 2570      | 4045      | 2105      | 1342      |
| Av.  | +6416     | +1871     | +1607     | +1164     | +2057     | +1941     | +673      |
| AL.  | +1.74     | +0.70     | +0.62     | +0.45     | +0.51     | +0.92     | +0.50     |
| Nv.  | +5223     | +23       | +146      | -200      | +964      | +546      | +91       |
| NEL. | +1.06     | +0.004    | +0.03     | -0.04     | +0.18     | +0.13     | +0.03     |
| MNEL | +5.3      | +0.04     | +0.38     | +0.8      | +9.0      | +4.33     | +1.5      |
| Mnv. | +261      | +2        | +18       | -40       | +482      | +182      | +45       |

Area: The encompassed surface area (km<sup>2</sup>); Ar1: Area of erosion; Ar2: Area of deposition; Ev. The eroded volume of the observed periods; EL (m): Net erosion depth per unit area ( $EL.=Ev./Ar1$ ); AL (m): Net accumulation depth per unit area ( $AL.=Ev./Ar1$ ); Av. The accreted volume of the observed periods; Nv. The net volume changes of the observed periods; NEL (m): Net depth deposition/erosion depth change ( $NEL.=Nv./Area$ ); MNEL (cm): Yearly mean depth change per unit area; Mnv: The mean yearly net volume change of the observed period; Mnv. The mean yearly net volume changes of the observed periods.

Table S7. Statistics of increased water level at Wusong by impacts of storm/typhoon

| Number | Occurrences | Increased water level (m) | Max. tidal level (m) | Max. wind power (Class) | Max. precipitation (mm) | Typhoon No. or name |
|--------|-------------|---------------------------|----------------------|-------------------------|-------------------------|---------------------|
| 1      | 1.9.1981    | 1.51                      | 5.74                 | 11~12                   | 22                      | 8114                |
| 2      | 27.9.1983   | 1.17                      | 4.86                 | 8~10                    | 24                      | 8310                |
| 3      | 27.8.1986   | 1.12                      | 4.50                 | 10                      | 25                      | 8615                |
| 4      | 4.8.1989    | 1.11                      | 5.35                 | 10                      | 90.9                    | 8913                |
| 5      | 18.8.1997   | 1.45                      | 5.99                 | 8~10                    | 131                     | 9711                |
| 6      | 31.8.2000   | 1.38                      | 5.87                 | 12                      | 79                      | Prapiroon           |
| 7      | 14.9.2000   | 1.29                      | 5.4                  | 8                       | 82.8                    | Saosmei             |
| 8      | 8.9.2002    | 0.96                      | 5.53                 | 7                       | /                       | Sinlaku             |
